# Supplementary material
Source: PubMed Central journal article supplement (PMC3946156)

**SUPPLEMENTARY MATERIAL**

**Supplementary Table 1.** Participant characteristics at last visit by Hippocampal Sclerosis of aging and Alzheimer's disease neuropathology (N=1,422), which is operationalized using a relative sensitive method AD-NP(I) which includes Braak stages III and IV.

| Characteristic                           | No HS-Aging Pathology  |                         | HS-Aging Pathology Present |                        |
|------------------------------------------|------------------------|-------------------------|----------------------------|------------------------|
|                                          | No AD-NP(I)<br>(n=425) | Yes AD-NP(I)<br>(n=879) | No AD-NP(I)<br>(n=30)      | Yes AD-NP(I)<br>(n=88) |
|                                          | N (%)                  |                         | N(%)                       |                        |
| Age at death (years)                     |                        |                         |                            |                        |
| 70-79                                    | 78 (18.4)              | 267 (30.4)              | 4 (13.3)                   | 14 (15.9)              |
| 80-89                                    | 165 (38.8)             | 418 (47.6)              | 9 (30.0)                   | 49 (55.7)              |
| 90+                                      | 182 (42.8)             | 194 (22.1)              | 17 (56.7)                  | 25 (28.4)              |
| Sex                                      |                        |                         |                            |                        |
| Female                                   | 204 (48.0)             | 398 (45.3)              | 14 (46.7)                  | 42 (47.7)              |
| Race†                                    |                        |                         |                            |                        |
| White                                    | 409 (96.5)             | 837 (95.2)              | 28 (93.3)                  | 79 (89.8)              |
| Black                                    | 7 (1.7)                | 30 (3.4)                | 1 (3.3)                    | 7 (8.0)                |
| Other                                    | 8 (1.9)                | 12 (1.4)                | 1 (3.3)                    | 2 (2.3)                |
| Hispanic ethnicity*                      | 17 (4.0)               | 31 (3.5)                | 2 (6.7)                    | 2 (2.3)                |
| Education*                               |                        |                         |                            |                        |
| College graduate                         | 238 (56.0)             | 476 (54.8)              | 19 (67.9)                  | 49 (56.3)              |
| Family History of Dementia*              |                        |                         |                            |                        |
| Yes                                      | 123 (36.0)             | 345 (53.6)              | 7 (29.2)                   | 31 (53.5)              |
| APOE ε4 alleles*                         |                        |                         |                            |                        |
| 0                                        | 236 (77.1)             | 271 (41.6)              | 16 (76.2)                  | 22 (38.0)              |
| 1                                        | 63 (20.6)              | 297 (45.6)              | 5 (23.8)                   | 28 (47.5)              |
| 2                                        | 7 (2.3)                | 83 (12.8)               | 0 (0.0)                    | 9 (15.3)               |
| Cognitive status                         |                        |                         |                            |                        |
| Demented                                 | 189 (44.5)             | 772 (87.8)              | 21 (70.0)                  | 86 (97.7)              |
| Primary clinical diagnosis               |                        |                         |                            |                        |
| Probable AD                              | 95 (22.4)              | 585 (66.6)              | 18 (60.0)                  | 80 (90.9)              |
| Possible AD                              | 40 (9.4)               | 94 (10.7)               | 6 (20.0)                   | 3 (3.4)                |
| Normal                                   | 167 (39.3)             | 45 (5.1)                | 2 (6.7)                    | 1 (1.1)                |
| Other                                    | 123 (28.9)             | 155 (17.6)              | 4 (13.3)                   | 4 (4.6)                |
|                                          | Mean (SD)              |                         | Mean (SD)                  |                        |
| Number of visits to ADC                  | 2.6 (1.4)              | 2.2 (1.3)               | 2.9 (1.9)                  | 2.5 (1.4)              |
| Age of onset † (years)*                  | 80.3 (11.2)            | 74.3 (8.6)              | 82.0 (10.3)                | 74.3 (7.9)             |
| Duration of cognitive symptoms† (years)* | 6.0 (4.1)              | 8.9 (4.2)               | 6.9 (3.6)                  | 10.9 (4.2)             |
| CDR-SB at last visit                     | 4.5 (5.5)              | 11.6 (6.0)              | 6.8 (5.8)                  | 14.3 (4.9)             |

*Abbreviations:* AD-NP (I), "intermediate to moderate" Alzheimer's disease neuropathology (Braak Stages III- VI and "moderate" or "frequent" CERAD neuritic plaque frequency); CDR-SB, Clinical Dementia Rating "sum of boxes"; HS-Aging, Hippocampal Sclerosis of Aging. \*Missing data: race (n=1, <1%), ethnicity (n=4, <1%), education (n=14, <1%), family history (n=354, 25.2%), APOE ε4 (385, 27.1%), and symptom duration (n=46, 3.7%). † Among participants with MCI or dementia (n=1,227)

**Supplementary Table 2.** Comparison of Test Scores between Participants with or without HS-Aging and AD-NP (no HS-Aging pathology, no AD-NP chosen as the reference group).\*

| <b>Neuropsychological or Clinical Test</b> | <b><math>\beta^\dagger</math></b> | <b>95% CI</b> | <b><i>p</i></b>  |
|--------------------------------------------|-----------------------------------|---------------|------------------|
| <b>CDR-SB‡ (N= 689)</b>                    |                                   |               |                  |
| No HS-Aging, no AD-NP                      | ---                               | ---           | ---              |
| No HS-Aging, yes AD-NP                     | -2.5                              | -3.1, -1.9    | <b>&lt;0.001</b> |
| Yes HS-Aging, no AD-NP                     | -.42                              | -1.88, 1.04   | <b>0.57</b>      |
| Yes HS-Aging, yes AD-NP                    | -3.85                             | -5.17, -2.54  | <b>&lt;0.001</b> |
| <b>Animal Generation Test (N=609)</b>      |                                   |               |                  |
| No HS-Aging, no AD-NP                      | ---                               | ---           | ---              |
| No HS-Aging, yes AD-NP                     | -2.52                             | -3.40, -1.64  | <b>&lt;0.001</b> |
| Yes HS-Aging, no AD-NP                     | -0.04                             | -2.12, 2.04   | <b>0.97</b>      |
| Yes HS-Aging, yes AD-NP                    | -3.23                             | -5.22, -1.23  | <b>0.002</b>     |
| <b>Delayed Logical Memory (N=582)</b>      |                                   |               |                  |
| No HS-Aging, no AD-NP                      | ---                               | ---           | ---              |
| No HS-Aging, yes AD-NP                     | -3.86                             | -4.60, -3.12  | <b>&lt;0.001</b> |
| Yes HS-Aging, no AD-NP                     | -3.32                             | -5.05, -1.60  | <b>&lt;0.001</b> |
| Yes HS-Aging, yes AD-NP                    | -3.99                             | -5.67, -2.30  | <b>&lt;0.001</b> |

*Abbreviations:* CDR-SB, Clinical Dementia Rating “sum of boxes”; HS-Aging, Hippocampal Sclerosis of Aging; AD-NP, Alzheimer’s disease neuropathology (Braak Stages V or VI and “moderate” or “frequent” CERAD neuritic plaque frequency).

\*Based on linear regression of each test score from a visit 2-5 years prior to death among participants with mild to moderate cognitive impairment, and adjusted for age at death, education and years between visit and death.

†A positive  $\beta$  represents a higher functioning compared to participants with no HS-Aging pathology, no AD-NP (reference)

‡CDR-SB scores were inverted so that an increase in score =higher functioning

**Supplementary Table 3.** Comparison of Test Scores between Participants with or without HS-Aging and AD-NP(I).

| <b>Neuropsychological or Clinical Test</b> | <b><math>\beta</math>†</b> | <b>95% CI</b> | <b><i>p</i></b>  |
|--------------------------------------------|----------------------------|---------------|------------------|
| <b>CDR-SB‡ (N= 689)</b>                    |                            |               |                  |
| Yes HS-Aging Pathology, No AD-NP(I)        | ---                        | ---           | ---              |
| No HS-Aging Pathology, No AD-NP(I)         | 0.0                        | -1.98, 1.99   | <b>1.00</b>      |
| No HS-Aging Pathology, Yes AD-NP(I)        | -2.56                      | -4.50, -0.61  | <b>0.01</b>      |
| Yes HS-Aging Pathology, Yes AD-NP(I)       | -3.73                      | -5.91, -1.56  | <b>0.001</b>     |
| <b>Animals Generation Test (N=609)</b>     |                            |               |                  |
| Yes HS-Aging Pathology, No AD-NP(I)        | ---                        | ---           | ---              |
| No HS-Aging Pathology, No AD-NP(I)         | -0.86                      | -3.62, 1.90   | <b>0.54</b>      |
| No HS-Aging Pathology, Yes AD-NP(I)        | -3.38                      | -6.08, -0.69  | <b>0.01</b>      |
| Yes HS-Aging Pathology, Yes AD-NP(I)       | -4.16                      | -7.23, -1.09  | <b>0.01</b>      |
| <b>Delayed Logical Memory (N=582)</b>      |                            |               |                  |
| Yes HS-Aging Pathology, No AD-NP(I)        | ---                        | ---           | ---              |
| No HS-Aging Pathology, No AD-NP(I)         | 4.48                       | 2.19, 6.78    | <b>&lt;0.001</b> |
| No HS-Aging Pathology, Yes AD-NP(I)        | 0.36                       | -1.88, 2.60   | <b>0.75</b>      |
| Yes HS-Aging Pathology, Yes AD-NP(I)       | 0.0                        | -2.57, 2.57   | <b>1.00</b>      |

*Abbreviations:* CDR-SB, Clinical Dementia Rating “sum of boxes”; HS-Aging, Hippocampal Sclerosis of Aging; AD-NP (I), “intermediate to moderate” Alzheimer’s disease neuropathology (Braak Stages III- VI and “moderate” or “frequent” CERAD neuritic plaque frequency).

\*Based on linear regression of each test score from a visit 2-5 years prior to death among participants with mild to moderate cognitive impairment, and adjusted for age at death, education and years between visit and death.

†A positive  $\beta$  represents a higher functioning compared to participants with HS-Aging pathology, no AD-NP

‡CDR-SB scores were inverted so that an increase in score =higher functioning

**Supplementary Figure 1.** Study sample flow chart. *Abbreviations:* AD-NP, Alzheimer’s disease neuropathology (Braak Stages V or VI and “moderate” or “frequent” CERAD neuritic plaque frequency); CDR-SB, Clinical Dementia Rating “sum of boxes”; FTLN, Frontotemporal lobar degeneration; HS-Aging, Hippocampal Sclerosis of Aging; NP; neuropathology; UDS, Uniform Data Set.

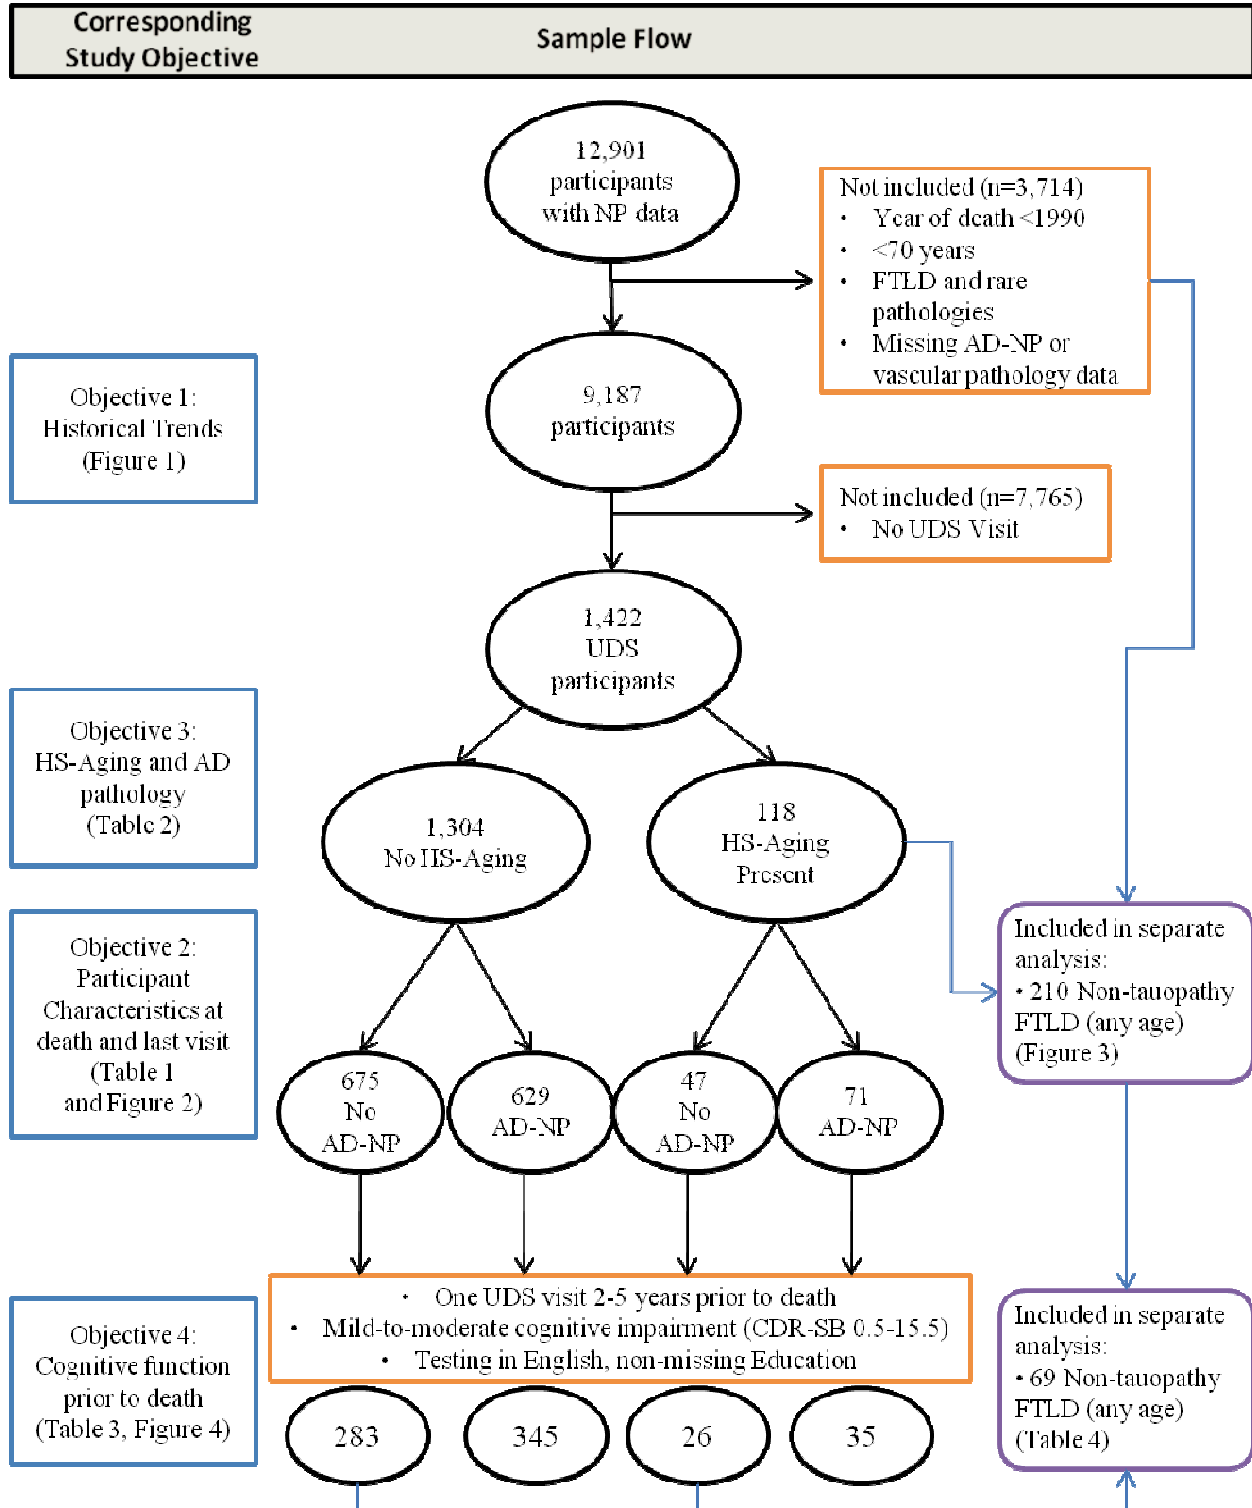

**Supplementary Figure 2.** Trends by age at death for pathological diagnoses in individuals with dementia. Shown are the primary or contributing pathological diagnosis of Hippocampal Sclerosis of Aging (HS-Aging), "intermediate/moderate" Alzheimer's disease neuropathology (AD-NP(I)), vascular disease, and Lewy bodies charted as a proportion of all pathological diagnoses among participants (70-103 years old at death) with dementia at last visit using fitted curves. (N=1,061).

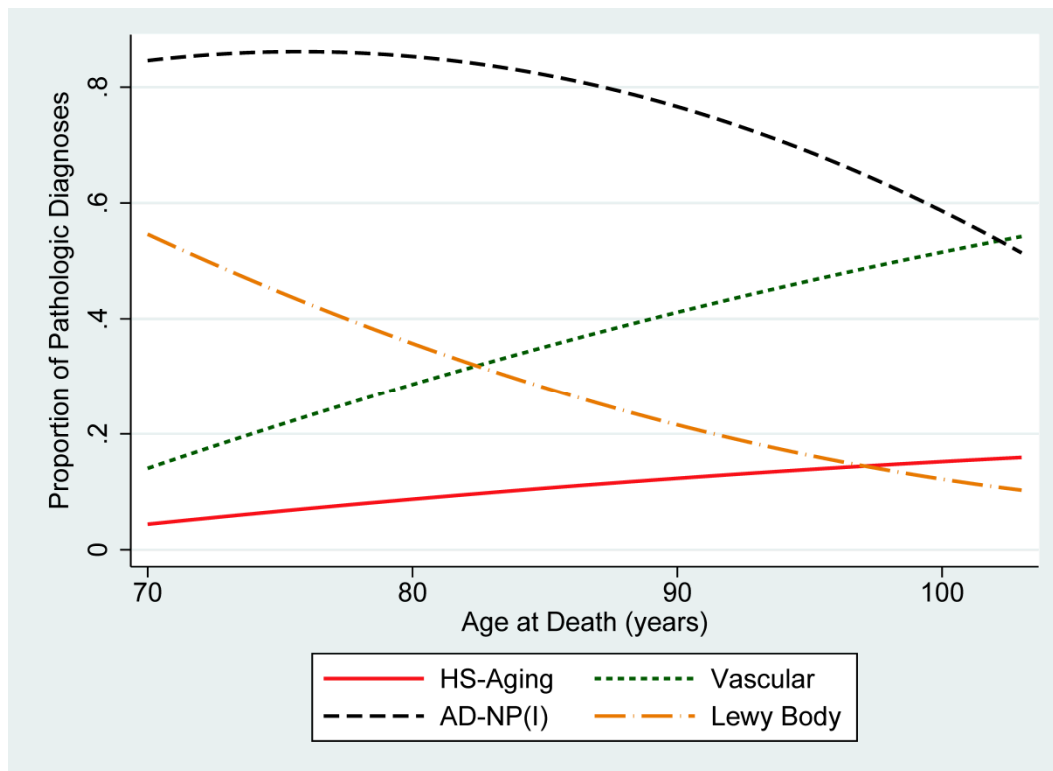

Supplement: NIHMS532961-supplement-supplement_1.pdf [file NIHMS532961-supplement-supplement_1.pdf]
